## **Risk factors for atopic and non-atopic asthma in school-aged children from high, and low and middle income countries**

Charlotte E Rutter,<sup>1</sup> Harriet Mpairwe,<sup>2</sup> Camila A Figueiredo,<sup>3</sup> Mary Njoroge,<sup>1</sup> Steven Robertson,<sup>1</sup> Hajar Ali,<sup>4</sup> Collin Brooks,<sup>4</sup> Jeroen Douwes,<sup>4</sup> Philip J Cooper,<sup>5,6,7</sup> Martha Chico,<sup>5</sup> Natalia Romero-Sandoval,<sup>6,8</sup> Alvaro A Cruz,<sup>9</sup> Mauricio L Barreto,<sup>10</sup> Neil Pearce,<sup>1</sup> Lucy Pembrey,<sup>1</sup> and the CAMERA Study Group

1 Department of Medical Statistics, London School of Hygiene and Tropical Medicine

2 MRC/UVRI and LSHTM Uganda Research Unit, Entebbe, Uganda

3 Institute of Health Sciences, Federal University of Bahia, Salvador, Brazil

4 Centre for Public Health Research, Massey University, Wellington, New Zealand

5 Fundacion Ecuatoriana Para Investigacion en Salud, Quito, Ecuador

6 School of Medicine, Universidad Internacional del Ecuador, Quito, Ecuador

7 Institute of Infection and Immunity, St George's University of London, London, UK

8 Grups de Recerca d'Amèrica i Àfrica Llatines-GRAAL, Barcelona, Spain

9 ProAR, Federal University of Bahia, Salvador, Brazil

10 The Centre for Data and Knowledge Integration for Health (CIDACS), Fiocruz, Bahia, Brazil

Corresponding author:

Dr Charlotte Rutter

Department of Medical Statistics

Faculty of Epidemiology and Population Health

London School of Hygiene and Tropical Medicine

Keppel Street

London

WC1E 7HT

Email: [Charlotte.Rutter1@lshtm.ac.uk](mailto:Charlotte.Rutter1@lshtm.ac.uk)

## **Abstract**

### *Background*

Although it is well established that there are different asthma phenotypes, little is known about risk factors and mechanisms for non-atopic asthma. We compared risk factors for atopy, atopic asthma (AA) in atopics, and non-atopic asthma (NAA) in non-atopics, in children in a wide variety of countries.

### *Methods*

Using four studies, across 23 countries, we assessed asthma status and atopy (skin prick tests) for children aged 6-17, plus risk factors from housing, heating, animals, family, diet, and air-quality categories. Using mixed effects logistic regression models we assessed 4 pathways to asthma: Pathway 1: comparing NAA with non-atopic non-asthma (risk factors for NAA among non-atopics); Pathway 2: comparing atopic non-asthma with non-atopic non-asthma (risk factors for atopy); Pathway 3: comparing AA with atopic non-asthma (risk factors for AA among atopics); Pathway 4: comparing AA with non-atopic non-asthma (risk factors for AA among non-atopics).

### *Results*

Our final sample of 32,741 children comprised 67% non-atopic non-asthmatics, 15% atopic non-asthmatics, 8% with AA and 10% with NAA. Risk factors were similar for AA in atopic individuals and NAA in non-atopic individuals (Pearson's correlation  $r=0.81$ ). In contrast, risk factors for atopy in non-asthmatics differed from those for AA in atopic individuals ( $r=-0.06$ ).

### *Discussion*

These findings indicate that although atopy increases the risk of asthma, the risk factors for subsequently developing asthma are generally the same in atopics and non-atopics. This raises important questions about the role of atopy in asthma, particularly whether it is an inherent part of the aetiological process or is coincidental.

## Key messages

1. The risk factors for developing asthma in atopic children are generally similar to risk factors for asthma in non-atopic children
2. Risk factors for asthma (in atopic or non-atopic children) are generally different from risk factors for atopy
3. These findings are consistent across high-income countries and low-and-middle-income countries

## Introduction

Although the importance of intrinsic (or non-allergic or non-atopic) asthma has been recognised since the early 20th century<sup>1</sup>, the focus of asthma research in the past 60 years has been predominantly on allergic mechanisms despite compelling evidence that at most half of asthma cases are attributable to atopy.<sup>2,3</sup>

As a consequence, little is known about the causes and pathophysiological mechanisms of non-allergic asthma, hampering the development of effective prevention and treatment options for a large proportion of asthmatics.

Atopic asthma (AA) is associated with T helper type 2-mediated airways inflammation (Th2), with atopy often identified (with varying results) by skin prick test (SPT) positivity to common allergens or serum allergen-specific IgE measurement (commonly associated with airways eosinophilia).<sup>4</sup> As noted above, the mechanisms underlying non-atopic asthma (NAA) remain unclear but may involve neutrophilic inflammation, neural mechanisms, infection-related responses, or other currently unknown pathophysiological pathways.<sup>5-7</sup> Different mechanisms may lead to different risk factors associated with disease. To make a valid comparison between NAA and AA we first need to tease apart the risk factors for asthma from the risk factors for atopy.

Figure 1 shows a framework for the various pathways potentially involved in the development of AA and NAA.<sup>8</sup> These are not often considered in studies of asthma risk factors, instead most studies have done one of the following:<sup>8</sup> (i) compared all asthma cases with all non-asthmatic controls, i.e. a mix of all four pathways; (ii) adjusted for atopy, i.e. an average of the effects of pathway 1 and pathway 3; (iii) compared AA with all non-asthmatics, i.e. a mix of pathways 2-4; (iv) compared NAA with all non-asthmatics, which does not correspond to any of the pathways in Figure 1; or a few studies have (v) stratified on atopy, i.e. yielding separate estimates for pathway 1 and pathway 3.

A 2014 review of the evidence for risk factors of NAA found that, of 30 risk factors evaluated in 43 studies, only three (family history of allergic disease, household dampness/mould, and childhood lower respiratory tract infections) showed consistent associations with NAA. A lack of breastfeeding, or breastfeeding for a limited period only, was less consistently associated with NAA. However, this review noted that most of these studies used inappropriate comparison groups.<sup>9</sup> There was also considerable methodological heterogeneity with different definitions of atopy and asthma, and different study designs, hampering valid comparisons.<sup>9</sup>

Here, using data from four studies: the International Study of Asthma and Allergies in Childhood (ISAAC) Phase II, the World Asthma Phenotypes Study (WASP), the Social Change, Asthma and Allergy in Latin America Study (SCAALA), and the Avon Longitudinal Study of Parents and Children (ALSPAC), we aimed to separately assess risk factors for each of the four pathways shown in Figure 1, and compare the findings between them, thus allowing the identification of modifiable factors that may increase/decrease the risk of NAA (pathway 1) and/or AA (pathways 2-4).

Although many risk factors for asthma have shown consistent effects in high income countries (HIC) and low-middle-income countries (LMIC), differences have been observed for some,<sup>10,11</sup> so we stratified results by country income level.

## Methods

### *Data sources*

The ISAAC Phase II cross-sectional questionnaire survey (with additional objective tests) commenced in 1998, targeting children aged 10-11, and included 30 centres from a mix of high-income and low-middle-income countries. Detailed methods have been published previously.<sup>12</sup>

The WASP cross-sectional case-control study was conducted in five centres in both high-income (UK, NZ) and low-middle-income countries (Brazil, Ecuador, Uganda). Approximately 200 asthmatics and 50 non-asthmatics were recruited in each centre between 2017 and 2020. Participants in Brazil, Ecuador and New Zealand were recruited from ongoing population-based cohort studies, with additional recruitment through the community (e.g., surveys in schools, sports events). In Uganda, participants were recruited from a larger case-control study of asthmatics and non-asthmatics identified through a cross-sectional survey in schools. Full details of the questionnaire and methods have been published previously.<sup>4</sup> The UK centre surveyed young adults (26-27 years) and has therefore been excluded from this analysis.

The SCAALA study involved a cross-sectional survey in Ecuador and a longitudinal study in Brazil, with detailed protocols published previously. In Ecuador, data were collected in 2006 on children aged 5-16 years in the Esmeraldas province.<sup>13</sup> In Brazil, data were collected in 2005 on children aged 4-11 years at baseline in the city of Salvador, Northeastern Brazil.<sup>14</sup> Data on asthma and allergic diseases (rhinitis and eczema) and potential risk factors were collected in successive surveys using standardised questionnaires.

The ALSPAC birth cohort study initially recruited pregnant women resident in Avon, UK, with expected delivery dates between April 1991 and December 1992. The study included regular surveys and tests throughout childhood, details of which have been reported previously.<sup>15,16</sup> Here we use data from the SPT at age 7 and surveys collected up to age 7 years.

From all sources, individuals with missing age or sex data, and those outside the target age group of 6-17 years were excluded from the analysis.

#### *Outcome and risk factor definitions*

Asthmatics were defined as having current asthma if they had wheeze symptoms and/or used asthma medications in the past 12 months. Non-asthmatics were defined as never having had asthma or asthma symptoms, and this was determined by either negative responses to questions on ever having wheeze symptoms or diagnosed asthma (ISAAC and SCAALA) or by negative responses to questions on recent wheeze symptoms across all surveys in ALSPAC. Participants qualifying for neither asthma status were excluded from the analyses, e.g., those who had previously had asthma. The exact criteria used as an equivalent for each study can be found in supplementary table S1.

We defined atopy as SPT positivity ( $\geq 3$ mm wheal in ISAAC, WASP and SCAALA,  $\geq 2$ mm wheal in ALSPAC) to at least one of a panel of five or more common allergens (study-dependent, see Table S2). Individuals testing positive for saline (negative control) or negative for histamine (positive control) were excluded, along with any individuals who had fewer than five allergens tested. Similar SPT methods were used in each study, and allergens appropriate for the local environment of each centre were used. A detailed comparison is in supplementary table S2.

Study participants were categorised into four groups: non-atopic non-asthmatic (X), atopic non-asthmatic (Y), atopic asthmatic (AA) and non-atopic asthmatic (NAA).

Potential risk factors included were those available in ISAAC (the largest study) and at least one other study. A comparison of the exact questions available in each study is summarised in supplementary table S1. Risk factors were based on questions on types of bedding, house condition, pets, diet, body mass index (BMI) and early life. Some risk factors in a study were not included in a particular centre; for example, WASP Uganda did not include questions on bedding, cooking or diet, WASP Brazil and New Zealand did not include the question on farm animals.

### *Statistical analyses*

Four sets of models were used, representing each pathway in Figure 1.

Pathway 1:  $X \rightarrow \text{NAA}$ , comparing NAA with non-atopic non-asthma (risk factors for NAA among non-atopics)

Pathway 2:  $X \rightarrow Y$ , comparing atopic non-asthma with non-atopic non-asthma (risk factors for atopy)

Pathway 3:  $Y \rightarrow \text{AA}$ , comparing AA with atopic non-asthma (risk factors for AA among atopics)

Pathway 4:  $X \rightarrow \text{AA}$ , comparing AA with non-atopic non-asthma (risk factors for AA among non-atopics)

For the first three pathways we examined which risk factors were associated with NAA (Figure 1, pathway 1), atopy (pathway 2), and AA in atopic children (pathway 3). Pathway 4 was more difficult to address as it is in addition to the two existing pathways, 2 and 3. It was assessed by estimating the overall association of non-atopic non-asthma (X) with AA (not adjusted or stratified on atopy) and comparing it with that predicted assuming no direct path, i.e., the Odds Ratio (OR) for pathway 2 ( $X \rightarrow Y$ ) multiplied by the OR for pathway 3 ( $Y \rightarrow \text{AA}$ ). A difference between the two figures was considered to indicate a possible direct path (assuming the difference was not due to misclassification or residual confounding). In addition, we also directly compared AA to NAA to see which factors differentiated them and how these compared to the risk factors for atopy alone.

Mixed-effects logistic regression models were fitted on the binary outcome representing each pathway, with a random intercept for centre and adjusting for age, sex, study, and country income level (LMIC / HIC). We first tested for evidence against a linear trend for age using the models with no risk factors by adding a quadratic term; the most appropriate form was then used for the models of each pathway. Individual models were fitted for each risk factor in turn, and results compared between pathways. The overall relationship between pathways was assessed using Pearson's correlation.

A similar set of models stratifying by country income group were also fitted, to test for interactions. Plus, separate models for each study were fitted (for available risk factors), to check for any heterogeneity in results.

Sensitivity analyses for the main non-stratified models were conducted with data from two of the studies, ISAAC and ALSPAC (due to data availability) to exclude borderline atopics. Two stricter atopy definitions were applied: any wheal of at least 5mm in the core allergens; 2 or more wheals of at least 4mm in the core allergens. These were compared to results using the standard definition of atopy but limited to the 2 studies. Those originally classed as atopic but not meeting the new definition were excluded from that analysis. The definition for non-atopics remained the same.

Data were analysed using Stata version 17.<sup>17</sup>

## Results

From a total sample of 71 916 participants (1205 from WASP, 54 271 from ISAAC, 8266 from SCAALA and 8174 from ALSPAC), 39 175 were excluded due to: missing symptom information (7273); not fitting case/ control status (e.g., previous but not current asthma symptoms) (10 754); no valid SPT result (20 334); either missing demographics or out of the age range (814). This left a final sample size of 32 741 (Table 1).

The final sample included 66% non-atopic non-asthmatics, 15% atopic non-asthmatics, 8% AA and 10% NAA. The WASP sample had a higher proportion of asthmatics (75%) than the others (15-30%) due to its case-control design, compared to cohort and cross-sectional designs for the other studies (Table 2).

The age distribution differed for each study; participants in WASP were the oldest but with a greater range (9+ years), ALSPAC the youngest (all around 7-8 years), ISAAC around 10-11 years and SCAALA ranging from 6-16 years (supplementary Figures S1-S3). The WASP dataset was 55% female, SCAALA



was 48% and ISAAC and ALSPAC were both 51% female. In WASP 64% of the individuals were from LMIC and in ISAAC this was 32%. SCAALA participants were all from LMIC (Brazil and Ecuador) and ALSPAC were all from HIC (UK).

The prevalence of each risk factor by study/centre is presented in Table 3. Each risk factor was available for a different subset of individuals, ranging from 14 060 for synthetic pillows to 31 175 for parental allergic diseases. There was considerable variation between centres for some variables, particularly indoor heating questions as some centres in hot countries do not use heating at all.

Results from the mixed effects logistic regression using random intercepts for centre and adjusting for study, sex, age and country income level (LMIC/HIC), but without including risk factors, showed that there was evidence that the effect of age was not linear for pathway 1 ( $P=0.03$ ) and for the AA/NAA comparison, but that there was no evidence against linearity for pathways 2-4 ( $P=0.18$ ,  $P=0.36$ ,  $P=0.57$  respectively). Thus, a quadratic age term was included in all models for pathway 1.

Figure 2 compares the estimated ORs of each risk factor between AA in already atopic individuals (pathway 3), and the risk of NAA in non-atopic individuals (pathway 1). The associations for the included risk factors were generally similar for AA and NAA, with a high positive correlation between the estimated effects (Pearson's correlation  $r=0.81$ ).

Figure 3 compares risk factors for atopy (pathway 2) with risk factors for AA in atopic individuals (pathway 3) with no correlation between the two ( $r=-0.06$ ), thus indicating that risk factors for atopy are different to those for asthma among atopics.

We also compared the risk factors for atopy (pathway 2) with the risk factors for AA compared to NAA, as in both of these groups the difference is atopy. We found a moderate positive correlation ( $r=0.54$ ) between these groups (supplementary Figure S4).

The individual results for each risk factor and outcome are shown in supplementary table S4, along with the predictions of pathway 4, based on the results for pathway 2 and 3. The observed and the

predicted values are similar so there is likely no direct pathway 4 (non-atopic to AA) over and above the two separate pathways 2 (non-atopy to atopy) and 3 (atopy to AA). Results comparing pathways 1-3 by category of risk factor are shown in supplementary Figures S5-S10.

The strongest risk factor for asthma was having a parental history of allergic disease (asthma, eczema or hay fever) (NAA OR=2.45 [95% CI=2.24, 2.69]; AA 2.05 [1.81, 2.31]). Breastfeeding (ever) was associated with a lower risk of NAA (0.75 [0.67, 0.85]) but being born prematurely (1.42 [1.19, 1.69]) or with a low birthweight (1.25 [1.05, 1.49]) was associated with an increased NAA risk.

Bedding-related risk factors included feather bedding (NAA 0.63 [0.52, 0.76]; Atopy 0.87 [0.76, 0.99]; AA 0.64 [0.52, 0.79]) and feather pillows (NAA 0.80 [0.66, 0.96]; Atopy 0.88 [0.77, 1.01]; AA 0.64 [0.50, 0.81]) which were both associated with a lower risk of asthma and atopy across all pathways. Conversely synthetic bedding was associated with a higher risk (NAA 1.33 [1.16, 1.53]; Atopy 1.18 [1.05, 1.31]; AA 1.51 [1.28, 1.79]).

Almost all indoor air related factors including damp (NAA 1.64 [1.41, 1.90]; Atopy 0.87 [0.75, 1.00]; AA 1.51 [1.22, 1.86]), mould (NAA 1.51 [1.29, 1.75]; Atopy 0.83 [0.69, 1.00]; AA 1.51 [1.20, 1.91]) and maternal smoking (current: NAA 1.46 [1.32, 1.62]; Atopy 0.84 [0.78, 0.92]; AA 1.22 [1.07, 1.40]; in first year: NAA 1.56 [1.40, 1.74]; Atopy 0.87 [0.78, 0.96]; AA 1.37 [1.18, 1.60]) were associated with an increased risk of asthma (NAA and AA) and a slight protective effect on atopy. Current use of coal/coke heating was associated with an increased risk of developing AA among atopic individuals (1.75 [1.11, 2.78]) but most other heating factors did not show a strong association with asthma or atopy.

There was evidence that having pet birds in the first year of life was associated with higher risk of asthma (NAA 1.38 [1.13, 1.68]; AA 1.47 [1.15, 1.87]), and pet dogs in the first year of life a higher risk of AA 1.41 [1.15, 1.72]. Many types of pet (both current and in first year of life) were associated with a lower risk of atopy (Any pets 0.87 [0.79, 0.95]; Cats 0.81 [0.74, 0.89]; Dogs 0.90 [0.82, 0.99]; Cats in

first year 0.83 [0.72, 0.95]; Dogs in first year 0.73 [0.63, 0.84]). Farm animal contact showed no association with either asthma or atopy.

Obesity (NAA 1.60 [1.28, 2.01]; AA 1.55 [1.10, 2.16]) and being overweight (NAA 1.31 [1.14, 1.50]; AA 1.24 [1.03, 1.51]) were associated with higher risk of both forms of asthma but were not related to risk of atopy alone. Regular fruit consumption was associated with a lower risk of asthma and weakly with an increased risk of atopy (NAA 0.80 [0.70, 0.93]; Atopy 1.14 [0.99, 1.31]; AA 0.78 [0.63, 0.97]).

With the models stratified by country affluence, there was evidence of a differential effect in HIC compared to LMIC for some risk factors, in some pathways (supplementary Table S3). There was still a positive correlation between risk factors for AA and NAA in both settings but some of the strongest risk factors were quite different by setting (Figure 4). The risk factors for atopy were unrelated to the risk factors for AA in both settings (Figure 5).

Notable results were that pet birds and dogs were both strong risk factors for asthma in LMIC but not in HIC. Coal/coke heating was a risk factor for AA in HIC but not LMIC. The protective effect of feather bedding and pillows was only found in HIC. Regular fast food was protective for AA (but not NAA) in LMIC only. Detailed results of these stratified models are in supplementary table S5.

Results for the separate studies (supplementary Tables S6 to S9) showed some differences, though the WASP study alone was relatively small, resulting in wide confidence intervals.

The sensitivity analyses, with different atopy definitions, showed similar outcomes. Using only ISAAC and ALSPAC but with the standard definition of atopy ( $n=26\,496$ ), the correlation between risk factors for AA in already atopic individuals (pathway 3), and NAA in non-atopic individuals was lower but still quite strongly positive ( $r=0.68$ ) and the correlation between risk factors for atopy (pathway 2) and AA in atopic individuals (pathway 3) was still very low ( $r=-0.08$ ). The sample size reduced to 23 188 using wheal size  $\geq 5$ mm for any core allergen and 22 243 using wheal size  $\geq 4$ mm for 2 or more core allergens. The correlation between risk factors for AA and NAA was slightly less strong ( $r=0.63$

for both definitions). The risk factors for AA and atopy had weak negative correlations ( $r=-0.13$  for wheal $\geq 5$ mm and  $r=-0.17$  for wheal $\geq 4$ mm for 2+ allergens) (Supplementary Figures S11-S12 and Table S10).

## Discussion

In these analyses, we have used a novel approach to assess risk factors for the different pathways to atopic and non-atopic asthma, in a large and diverse population representing both HICs and LMICs.

Our findings on lifestyle and environmental factors indicate that, of the risk factors included, they are similar for NAA (in non-atopic children) and AA (in atopic children) but not necessarily for atopy. For example, dog contact in the first year of life showed a strong association for AA in atopics (OR=1.41), a positive estimate but no evidence of effect for NAA in non-atopics (1.10) and a protective association with atopy (0.73); frequent fruit intake showed strong and consistent protective associations for asthma (0.80 and 0.78 for NAA and AA respectively) but a positive association with atopy (1.09); maternal smoking at various times in the child's life was strongly associated with increased risk of NAA (ORs between 1.46 and 1.56) and AA (between 1.22 and 1.40) but was associated with reduced risk of atopy (0.84 to 0.89), similarly for damp and mould variables (NAA from 1.49 to 1.64; AA from 1.47 to 1.69; atopy 0.83 to 0.93); whereas parental history of allergic diseases was a strong risk factor for both forms of asthma (NAA 2.45 and AA 2.05) and atopy (1.38). Although atopy (defined using SPT) is associated with increased risk of asthma, other risk factors are generally the same for AA and NAA. Of course, there may be important risk factors that were not included in this study, particularly for NAA which has not been as extensively studied, and the results may have been different if these "other" risk factors (e.g., air pollution, viral infections, stress) had been examined. Nevertheless, we have included a large number of commonly recognised and studied risk factors in our analyses, including most of the risk factors that have been identified as being associated with asthma in major studies such as ISAAC and GAN.<sup>10,18</sup> The fact that we have

found these risk factors to have similar associations with both asthma in atopics (AA) and asthma in non-atopics (NAA) raises important questions about the role of atopy in asthma, particularly whether it is an inherent part of the aetiological process, or an exacerbating factor (or a mix of both), or is coincidental. Alternatively, NAA and AA could be separate phenotypes caused by different mechanisms for the initial onset of asthma but with similar exacerbating factors. However, this cannot be established from our cross-sectional studies as it is not possible to differentiate risk factors for initial onset from those for exacerbation of pre-existing asthma.

Risk factors in the animal contact and air-quality categories showed a particularly striking pattern of a negative association with atopy but a positive association with asthma (both AA and NAA) (Supplementary Figures S7 and S9). This pattern is apparent for risk factors from early life as well as current, so is unlikely to be due to reverse causation or specific to exacerbation of symptoms.

In comparing our method of investigating different pathways to the other methods listed in the introduction, we found, as an example, that fruit intake (which was protective for NAA and AA but a risk factor for atopy in our analysis) was protective when comparing all asthma to all non-asthma, also when adjusting for atopy, and when comparing NAA to all non-asthmatics. However this effect was not seen when comparing AA to all non-asthmatics (as the effect was confounded by atopy). If the differences between risk factors for NAA and AA were greater than we observed, consideration of the separate pathways is even more important.

A strength of this study is the inclusion of data from 23 different countries, including both HICs and LMICs, as well as the resulting large sample size. Previous analyses of ISAAC data have generally found the risk factors for asthma to be similar in HICs and LMICs, providing for triangulation of findings,<sup>19</sup> and increasing the likelihood that the associations are causal. However, there are difficulties in ensuring the relevance of questions in varying settings e.g., heating questions in different climates. In addition, some risk factors may be differentially associated with socio-

economic position (SEP), which we partially assessed by stratifying the results by country income level, but we do not have the information to assess differences within country.

The strongest risk factor we found for both types of asthma, and also for atopy alone, was parental history of allergic disease, which is consistent with previously published findings.<sup>9,20</sup> Other strong risk factors for asthma (AA and NAA), but not atopy, were damp and mould in the home, which are already established risk factors for childhood asthma (both aetiology and exacerbation).<sup>9</sup> Obesity was a risk factor for both AA and NAA in HIC, which is consistent with literature,<sup>9</sup> but we did not see this in LMICs; whereas pet birds and dogs were risk factors for AA and NAA only in LMIC. These differences could indicate that these are not true risk factors and that associations were due to confounding e.g., by SEP, or there were some other differences between settings that were not captured e.g. keeping birds could mean one budgie in a cage or a brood of chickens.

Other limitations of these analyses should also be considered. The associations reported here will likely be subject to residual confounding as not all asthma risk factors are known or were recorded in all the included studies. Furthermore, the questionnaire was relatively simple, and most questions were binary. Reverse causation is also a possibility as this is cross-sectional rather than longitudinal data, e.g., those with asthma (or family members) may have changed to synthetic bedding if feathers exacerbate symptoms. Recall bias could also be an issue, with parents of asthmatics more likely to recall information on known risk factors than parents of non-asthmatics. Additionally there is evidence of a disassociation between SPT and IgE in LMIC where some individuals with negative SPT are IgE-positive to the same allergen.<sup>21</sup>

Our findings are important as they point towards similar mechanisms in AA and NAA, once the risk factors for atopy itself are removed. With SPT positivity defining atopy, there is no evidence that the risk factors differ between asthma phenotypes, even after using stricter definitions in sensitivity analyses. This suggests that atopy and asthma may be coincidental in a large proportion of children who are defined as having AA. To confirm or refute these findings, further work on identifying

different phenotypes of asthma should be undertaken in a variety of populations, including using other markers and data sources (e.g., microbiome and epigenetics). IgE analysis could identify patterns in potential allergens and clinical tests could investigate the role of neurological triggers.

### **CAMERA Study Group**

United Kingdom, London: Neil Pearce, Lucy Pembrey, Mary Njoroge, Steven Robertson, Charlotte E Rutter, Donna Davoren, David Rebellon Sanchez

Brazil: Alvaro Cruz, Camila Figueiredo, Mauricio Barreto, Cinthia Vila Nova Santana, Gabriela Pimentel Pinheiro, Gilvaneide Lima, Leticia Marques, Auxiliadora Damiane Costa, Karla Nicole, Candace Andrade, Bianca Sampaio Dotto Fiuza, Luciano Gama da Silva Gomes.

Ecuador: Philip Cooper, Natalia Romero-Sandoval, Santiago Mena, Lucia Alonzo, Genesis Palma, Maria Fernanda Arias, Jessica Alchundia, Karla Solorzano, Martha Chico.

New Zealand: Jeroen Douwes, Collin Brooks, Hajar Ali, Jeroen Burmanje

Uganda: Harriet Mpairwe, Irene Nambuya, Pius Tumwesige, Milly Namutebi, Marble Nnaluuwoza, Mike Mukasa

### **Ethics approval**

Ethical approval was obtained from the London School of Hygiene & Tropical Medicine (LSHTM) ethics committee (ref: 26308)

### **Data availability**

ISAAC data are publicly available at the UK Data Service archive

<http://discover.ukdataservice.ac.uk/catalogue?sn=8131>. ALSPAC data can be accessed after

application to the ALSPAC Executive Team; application instructions and data use agreements are

available at <http://www.bristol.ac.uk/alspac/researchers/access/>. The relevant data from the WASP study and SCAALA study will be shared on reasonable request to the corresponding author.

### **Acknowledgements**

We thank all the participants, their parents, and the researchers involved in the WASP, ISAAC, SCAALA and ALSPAC studies for providing the data for this work to be completed.

### **Author contributions**

N.P. conceived of and designed the study with support from C.B., H.M., M.B., P.J.C., J.D., C.A.F., A.A.C. and L.P.; C.E.R and S.R. were responsible for data cleaning and management; C.E.R. analysed the data; C.E.R, N.P. and L.P. wrote the first draft of the manuscript; all other authors contributed to revisions of the manuscript. Others also contributed to the planning and conduct of the study, and are listed below as part of the CAMERA Study Group.

### **Funding**

The CAMERA project was supported by the European Research Council under ERC grants 668954, and 101020088. The SCAALA study was supported by the Wellcome Trust under grant 072405/Z/03/Z/WT. Work in Salvador was also supported by: Fundação de Amparo à Pesquisa do Estado da Bahia (FAPESB) under grants PNE0003/2014 and PNX0001/2014; Coordenação de Aperfeiçoamento de Pessoal de Nível Superior - Brasil (CAPES) under finance code 001; Conselho Nacional de Desenvolvimento Científico e Tecnológico (CNPq) under grant 308521/2019 and CNPq/CONFAP/FAPESB under grant 40314. Work in Wellington was supported by the Health Research Council (HRC) of New Zealand and CB was supported by an HRC Sir Charles Hercus Fellowship.



## References

1. Lötvalld J, Akdis CA, Bacharier LB, Bjermer L, Casale TB, Custovic A, Lemanske RF Jr, Wardlaw AJ, Wenzel SE, Greenberger PA. Asthma endotypes: a new approach to classification of disease entities within the asthma syndrome. *J Allergy Clin Immunol*. 2011 Feb;127(2):355-60. doi: 10.1016/j.jaci.2010.11.037. PMID: 21281866.
2. Pembrey L, Brooks C, Mpairwe H, et al. Asthma inflammatory phenotypes on four continents: most asthma is non-eosinophilic. *Int J Epidemiol*. 2022 Aug 30;dyac173. doi: 10.1093/ije/dyac173.
3. Pearce N, Pekkanen J, Beasley R. How much asthma is really attributable to atopy? *Thorax*. 1999;54(3):268-72
4. Pembrey L, Barreto ML, Douwes J, et al. Understanding asthma phenotypes: the World Asthma Phenotypes (WASP) international collaboration. *ERJ Open Res*. 2018 Aug 22;4(3):00013-2018. doi: 10.1183/23120541.00013-2018. PMID: 30151371; PMCID: PMC6104297.
5. Gibson PG, Simpson JL, Saltos N. Heterogeneity of airway inflammation in persistent asthma : evidence of neutrophilic inflammation and increased sputum interleukin-8. *Chest*. 2001 May;119(5):1329-36. doi: 10.1378/chest.119.5.1329. PMID: 11348936.
6. Ali H, Brooks C, Crane J, et al. Enhanced airway sensory nerve reactivity in non-eosinophilic asthma. *BMJ Open Respir Res*. 2021 Nov;8(1):e000974. doi: 10.1136/bmjresp-2021-000974. PMID: 34728474; PMCID: PMC8565536.
7. Figueiredo CA, Rodrigues LC, Alcantara-Neves NM, et al. Does IFN- $\gamma$  play a role on the pathogenesis of non-atopic asthma in Latin America children? *Allergy Asthma Clin Immunol*. 2012 Dec 19;8(1):18. doi: 10.1186/1710-1492-8-18. PMID: 23253516; PMCID: PMC3564733.
8. Barreto ML, Cunha SS, Fiaccone R, Esquivel R, Amorim LD, Alvim S, Prado M, Cruz AA, Cooper PJ, Santos DN, Strina A, Alcantara-Neves N, Rodrigues LC. Poverty, dirt, infections and non-atopic wheezing in children from a Brazilian urban center. *Respir Res*. 2010 Dec 1;11(1):167. doi: 10.1186/1465-9921-11-167.
9. Strina A, Barreto ML, Cooper PJ, Rodrigues LC. Risk factors for non-atopic asthma/wheeze in children and adolescents: a systematic review. *Emerg Themes Epidemiol*. 2014;11:5
10. Silverwood RJ, Rutter CE, Mitchell EA, Asher MI, Garcia-Marcos L, Strachan DP, Pearce N; ISAAC Phase Three Study Group. Are environmental risk factors for current wheeze in the International Study of Asthma and Allergies in Childhood (ISAAC) phase three due to reverse causation? *Clin*

- Exp Allergy. 2019 Apr;49(4):430-441. doi: 10.1111/cea.13325. Epub 2019 Jan 23. PMID: 30508327; PMCID: PMC6487816.
11. Strachan D, Ait-Khaled N, Foliaki S, et al. Siblings, asthma, rhinoconjunctivitis and eczema: a worldwide perspective from the International Study of Asthma and Allergies in Childhood. *Clinical and Experimental Allergy* 2015; 45: 126-136.
  12. Weiland SK, Björkstén B, Brunekreef B, et al. Phase II of the International Study of Asthma and Allergies in Childhood (ISAAC II): rationale and methods. *Eur Respir J*. 2004 Sep;24(3):406-12. doi: 10.1183/09031936.04.00090303. PMID: 15358699.
  13. Cooper PJ, Chico ME, Vaca MG, et al. Risk factors for asthma and allergy associated with urban migration: background and methodology of a cross-sectional study in Afro-Ecuadorian school children in Northeastern Ecuador (Esmeraldas-SCAALA Study). *BMC Pulm Med*. 2006 Sep 13;6:24. doi: 10.1186/1471-2466-6-24. PMID: 16970809; PMCID: PMC1578586. Barreto 2006
  14. Barreto ML, Cunha SS, Alcântara-Neves N, et al. Risk factors and immunological pathways for asthma and other allergic diseases in children: background and methodology of a longitudinal study in a large urban center in Northeastern Brazil (Salvador-SCAALA study). *BMC Pulm Med*. 2006 Jun 23;6:15. doi: 10.1186/1471-2466-6-15. PMID: 16796729; PMCID: PMC1559717.
  15. Boyd A, Golding J, Macleod J, et al.: Cohort Profile: the 'children of the 90s'--the index offspring of the Avon Longitudinal Study of Parents and Children. *Int J Epidemiol*. 2013;42(1):111–27. 10.1093/ije/dys064.
  16. Fraser A, Macdonald-Wallis C, Tilling K, et al.: Cohort profile: The Avon Longitudinal Study of Parents and Children: ALSPAC mothers cohort. *Int J Epidemiol*. 2013;42(1):97–110. 10.1093/ije/dys066.
  17. StataCorp. 2021. Stata Statistical Software: Release 17. College Station, TX: StataCorp LLC.
  18. Rutter CE, Silverwood RJ, Asher MI, Ellwood P, Pearce N, Garcia-Marcos L, Strachan DP; ISAAC Phase Three Study Group. Comparison of individual-level and population-level risk factors for rhinoconjunctivitis, asthma, and eczema in the International Study of Asthma and Allergies in Childhood (ISAAC) Phase Three. *World Allergy Organ J*. 2020 Jul 2;13(6):100123. doi: 10.1016/j.waojou.2020.100123. PMID: 32642022; PMCID: PMC7334817.
  19. Lawlor DA, Tilling K, Davey Smith G. Triangulation in aetiological epidemiology. *International Journal of Epidemiology* 2016;45:1866-86.

20. He, P., Moraes, T.J., Dai, D. et al. Early prediction of pediatric asthma in the Canadian Healthy Infant Longitudinal Development (CHILD) birth cohort using machine learning. *Pediatr Res* (2024). doi: 10.1038/s41390-023-02988-2.
21. Alcantara-Neves NM, Veiga RV, Ponte JC, da Cunha SS, Simões SM, Cruz ÁA, Yazdanbakhsh M, Matos SM, Silva TM, Figueiredo CA, Pontes-de-Carvalho LC, Rodrigues LC, Fiaccone RL, Cooper PJ, Barreto ML. Dissociation between skin test reactivity and anti-aeroallergen IgE: Determinants among urban Brazilian children. *PLoS One*. 2017 Mar 28;12(3):e0174089. doi: 10.1371/journal.pone.0174089. PMID: 28350867; PMCID: PMC5369757.

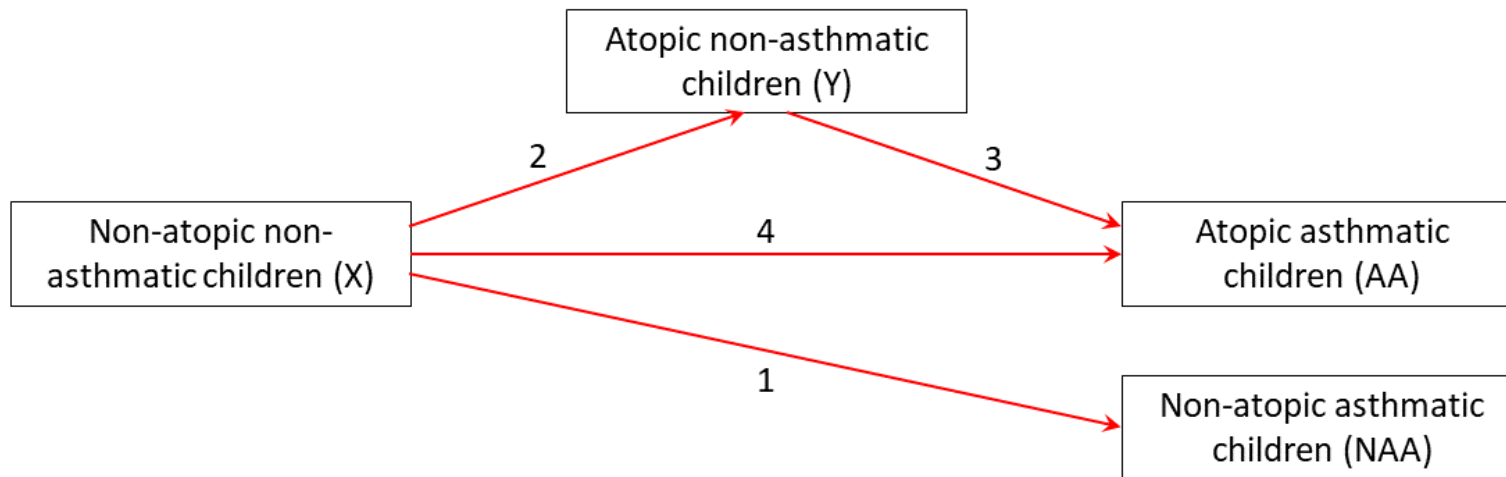

| Pathway    | Investigation                                             |
|------------|-----------------------------------------------------------|
| 1: X → NAA | Risk factors for non-atopic asthma in non-atopic children |
| 2: X → Y   | Risk factors for atopy                                    |
| 3: Y → AA  | Risk factors for atopic asthma among atopic children      |
| 4: X → AA  | Risk factors for atopic asthma among non-atopic children  |

Figure 1: Pathways of possible asthma causation (Adapted from Barreto et al, 2010)

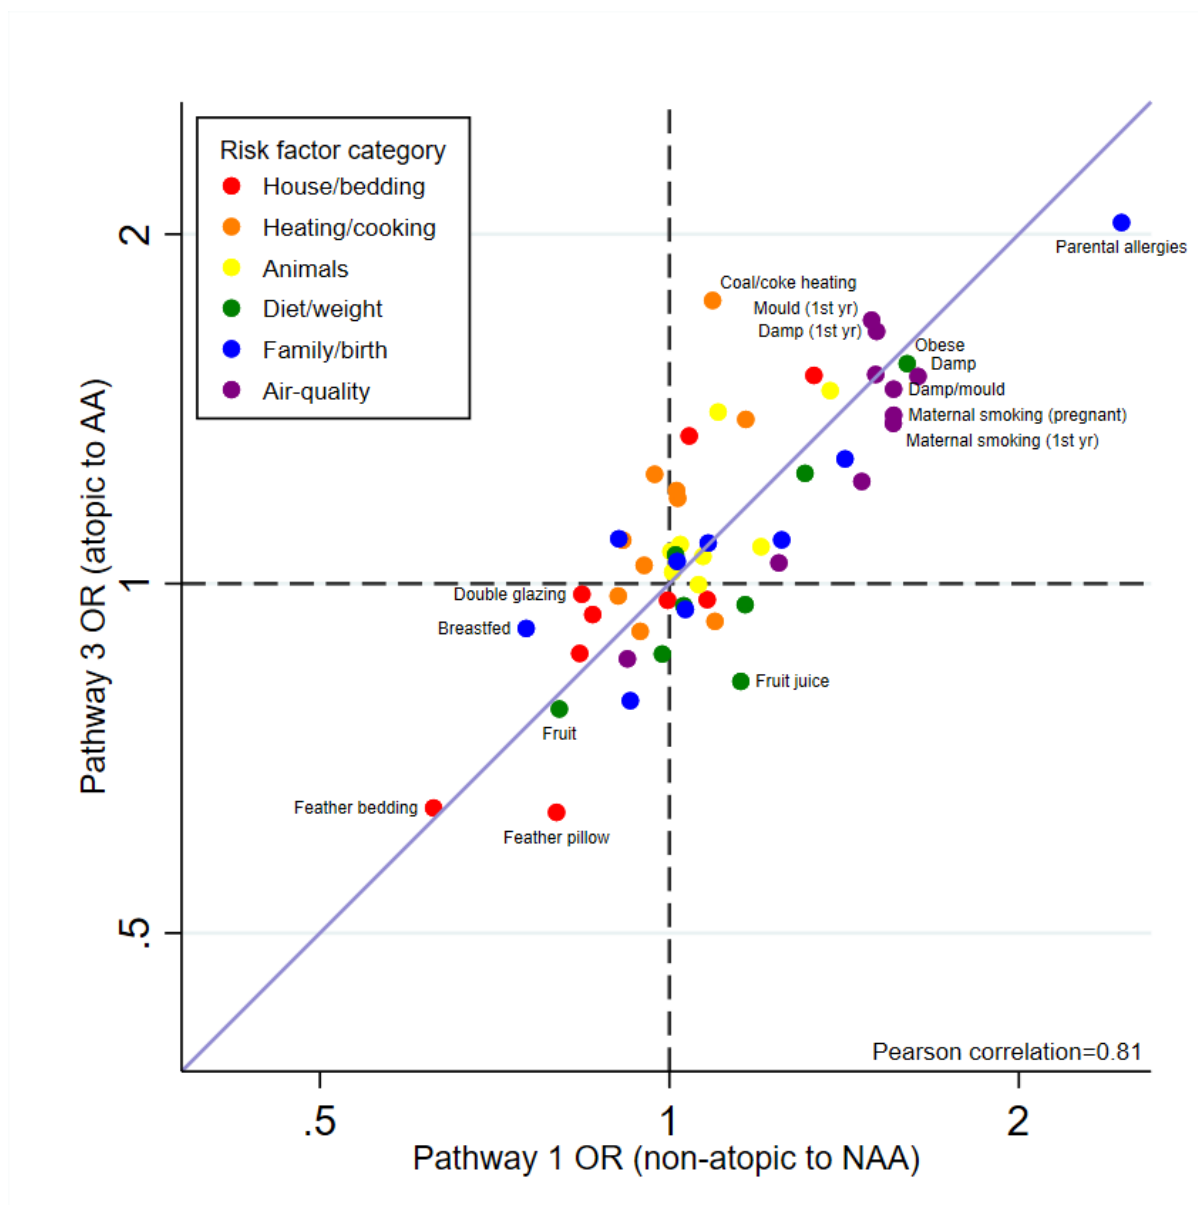

Figure 2: Estimated Odds ratios (ORs) of risk factors for atopic asthma compared to non-atopic asthma, excluding atopy risk (Pathways 3 v 1)

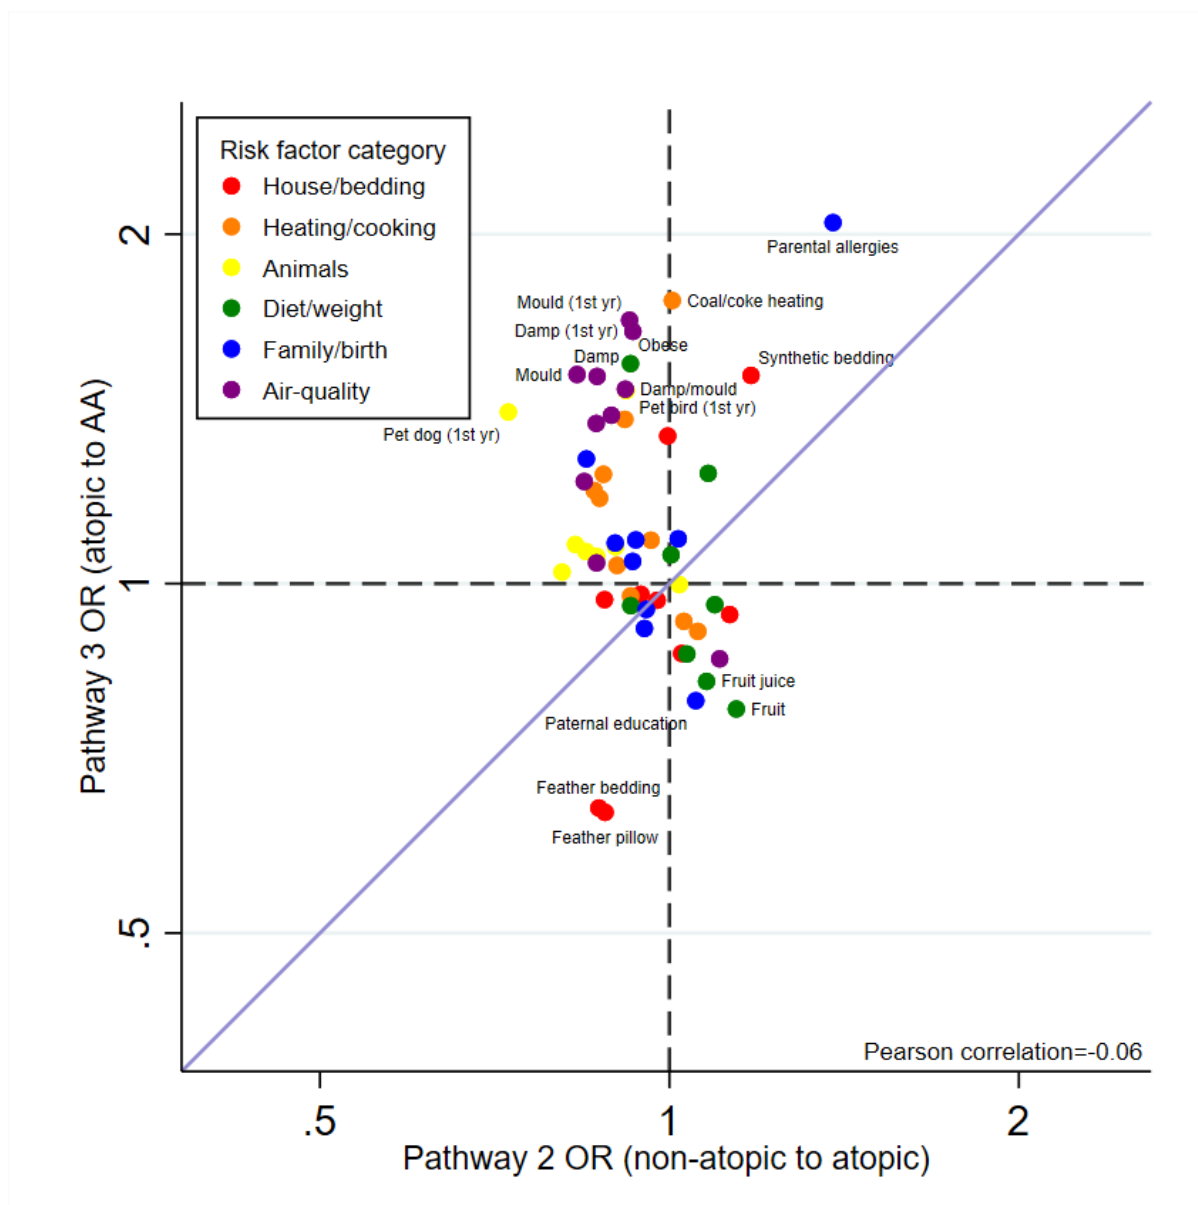

**Figure 3: Estimated Odds ratios (ORs) of risk factors for asthma (in atopic individuals) compared to atopy (Pathways 3 v 2)**

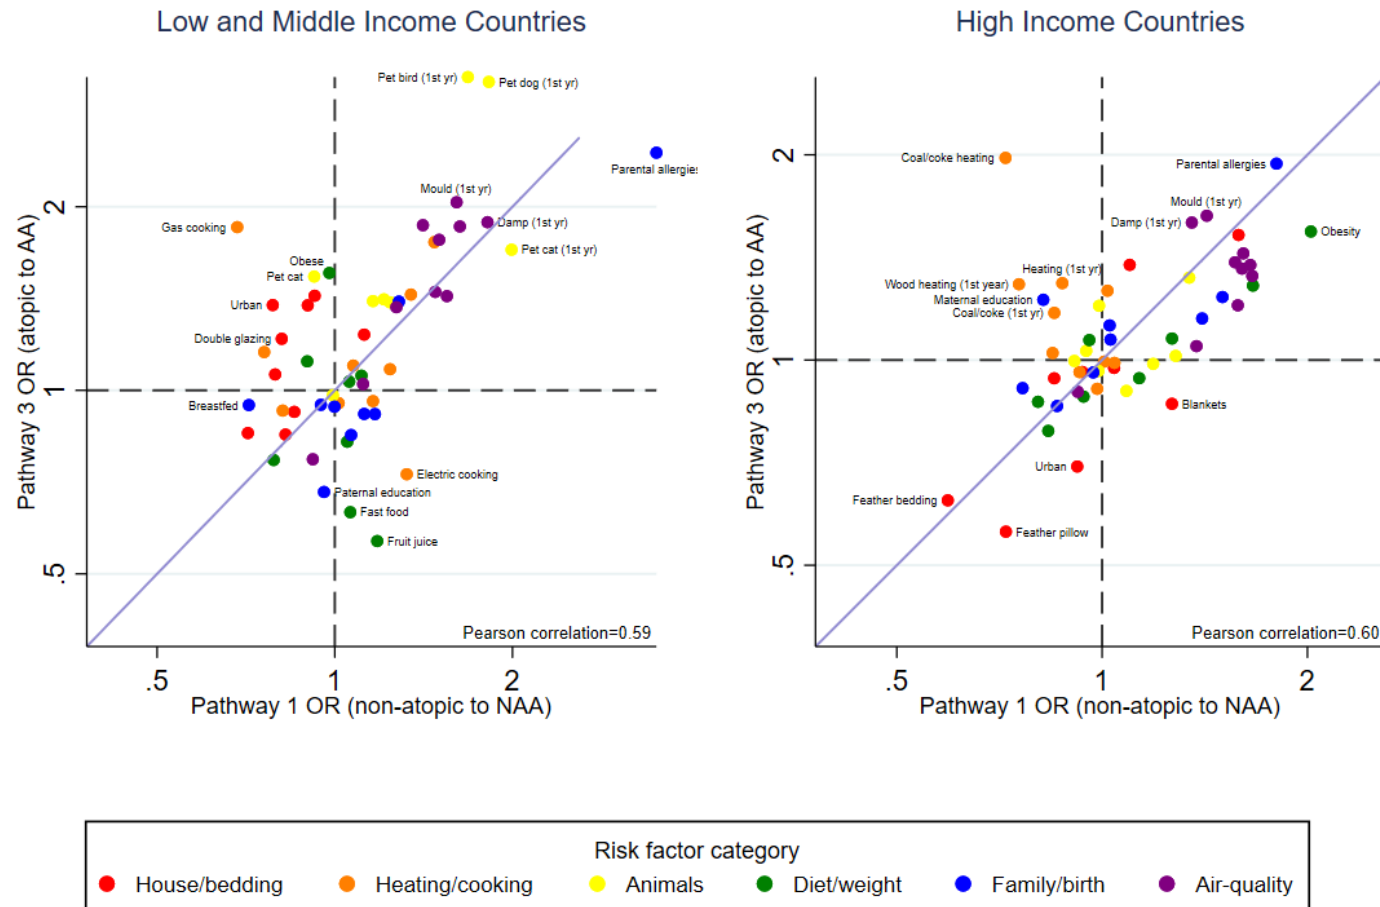

**Figure 4: Estimated Odds ratios (ORs) of risk factors for atopic asthma compared to non-atopic asthma, excluding atopy risk (Pathways 3 v 1) stratified by country affluence**

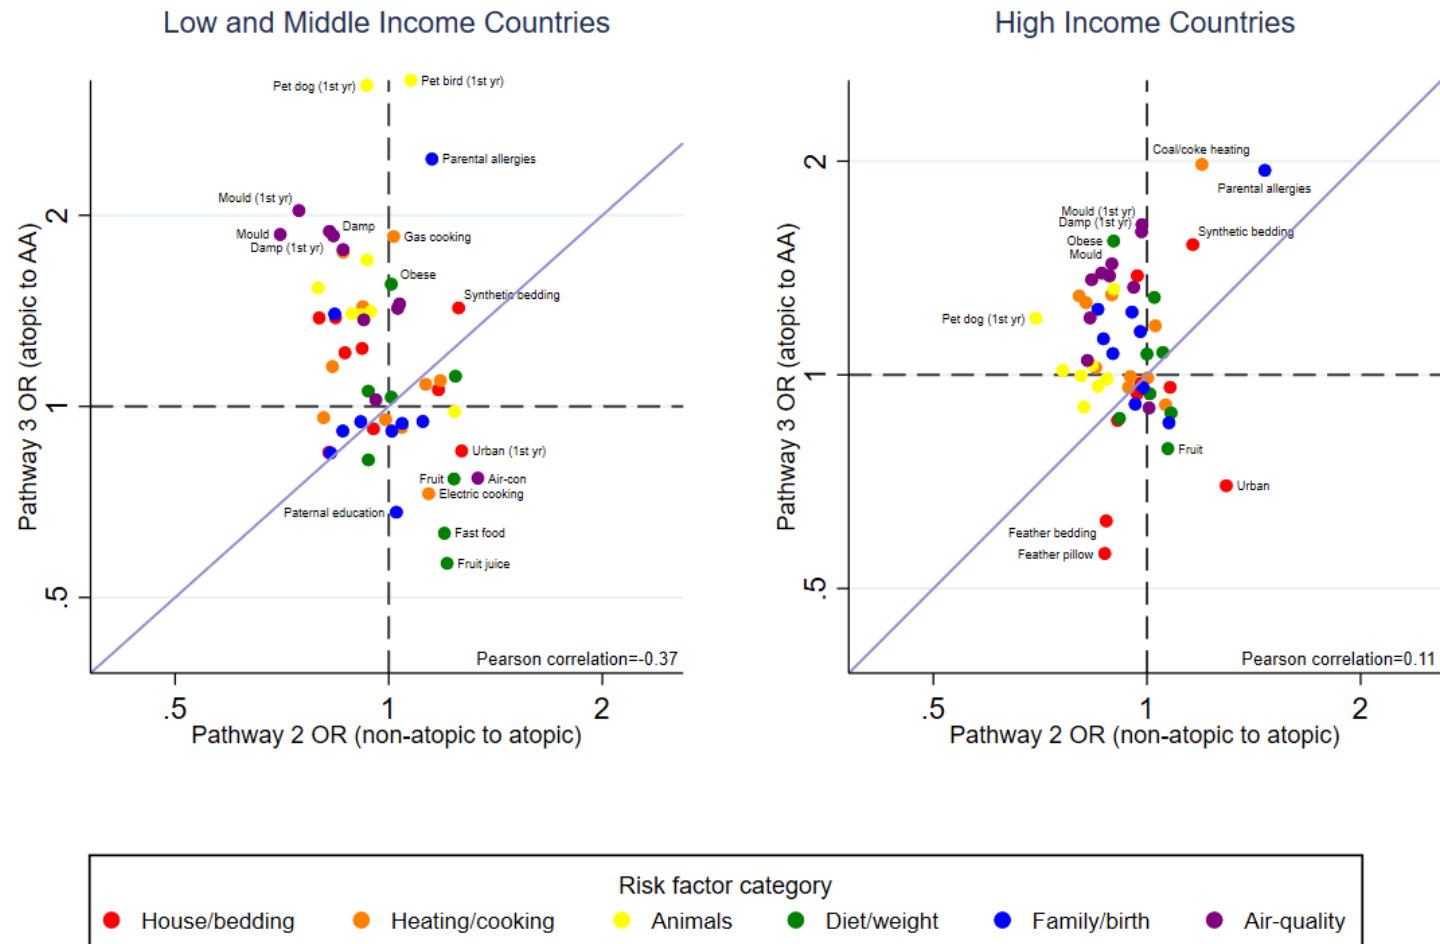

Figure 5: Estimated Odds ratios (ORs) of risk factors for asthma (in atopic individuals) compared to atopy (Pathways 3 v 2) stratified by country affluence



**Table 1: Exclusions**

|                  | WASP | ISAAC  | SCAALA | ALSPAC            | Total  |
|------------------|------|--------|--------|-------------------|--------|
| Starting sample  | 1205 | 54 271 | 8266   | 8174 <sup>a</sup> | 71 916 |
| Missing symptoms | 0    | 5183   | 0      | 2090              | 7273   |
| Not case/control | 94   | 6469   | 2265   | 1926              | 10 754 |
| No atopy data    | 22   | 18 789 | 231    | 1292              | 20 334 |
| Missing sex/age  | 0    | 147    | 0      | 26                | 173    |
| Not age 6-17     | 166  | 27     | 448    | 0                 | 641    |
| Final sample     | 923  | 23 656 | 5322   | 2840              | 32 741 |

<sup>a</sup>individuals who completed the age 7 questionnaire, without second twin; ISAAC=International Study of Asthma and Allergies in Childhood; WASP=World Asthma Phenotypes; SCAALA=Social Changes, Asthma and Allergy in Latin America; ALSPAC= Avon Longitudinal Study of Parents and Children;

**Table 2: Distribution of main outcome by study**

| Study         | Non-Atopic Non-Asthmatic (X) (%) | Atopic Non-Asthmatic (Y) (%) | Atopic Asthmatic (AA) (%) | Non-Atopic Asthmatic (NAA) (%) | Total  |
|---------------|----------------------------------|------------------------------|---------------------------|--------------------------------|--------|
| <b>WASP</b>   | 171 (19%)                        | 66 (7%)                      | 422 (46%)                 | 264 (29%)                      | 923    |
| <b>ISAAC</b>  | 16 239 (69%)                     | 3922 (17%)                   | 1584 (7%)                 | 1911 (8%)                      | 23 656 |
| <b>SCAALA</b> | 3860 (73%)                       | 560 (11%)                    | 203 (4%)                  | 699 (13%)                      | 5322   |
| <b>ALSPAC</b> | 1650 (58%)                       | 322 (11%)                    | 433 (15%)                 | 435 (15%)                      | 2840   |
| <b>TOTAL</b>  | 21 920 (67%)                     | 4870 (15%)                   | 2642 (8%)                 | 3309 (10%)                     | 32 741 |

ISAAC=International Study of Asthma and Allergies in Childhood; WASP=World Asthma Phenotypes; SCAALA=Social Changes, Asthma and Allergy in Latin America; ALSPAC= Avon Longitudinal Study of Parents and Children

**Table 3: Prevalence of potential risk factors by centre / study**

| Category                            | Covariable                                | n     | ISAAC Multiple | WASP Brazil | WASP Ecuador | WASP New Zealand | WASP Uganda | WASP total | SCAALA Brazil | SCAALA Ecuador | SCAALA total | ALSPAC UK | Overall Total |     |
|-------------------------------------|-------------------------------------------|-------|----------------|-------------|--------------|------------------|-------------|------------|---------------|----------------|--------------|-----------|---------------|-----|
| Confounder                          | Male sex                                  | 32741 | 49%            | 38%         | 59%          | 49%              | 29%         | 45%        | 53%           | 51%            | 52%          | 49%       | 49%           |     |
| House/<br>bedding                   | Feather bedding                           | 14156 | 18%            | 4%          | 18%          | 37%              | .           | 25%        | .             | .              | .            | .         | 18%           |     |
|                                     | Synthetic bedding                         | 14155 | 43%            | 46%         | 4%           | 55%              | .           | 35%        | .             | .              | .            | .         | 43%           |     |
|                                     | Blankets                                  | 15560 | 44%            | 14%         | 56%          | 47%              | .           | 45%        | 22%           | .              | 22%          | .         | 43%           |     |
|                                     | Feather pillow                            | 14780 | 17%            | 6%          | 55%          | 24%              | .           | 32%        | .             | .              | .            | .         | 17%           |     |
|                                     | Synthetic pillow                          | 14060 | 39%            | 71%         | 1%           | 72%              | .           | 47%        | .             | .              | .            | .         | 40%           |     |
|                                     | Double glazing                            | 20831 | 55%            | .           | .            | .                | .           | .          | .             | .              | .            | .         | 81%           | 58% |
|                                     | Double glazing in 1 <sup>st</sup> year    | 20194 | 45%            | .           | .            | .                | .           | .          | .             | .              | .            | .         | 59%           | 47% |
|                                     | Urban                                     | 23452 | 92%            | .           | .            | .                | .           | .          | 100%          | 36%            | 45%          | 88%       | 81%           |     |
| Urban in 1 <sup>st</sup> year       | 16953                                     | 89%   | .              | .           | .            | .                | .           | .          | .             | .              | .            | 93%       | 89%           |     |
| Heating/<br>cooking                 | Heating                                   | 16979 | 68%            | 0%          | 0%           | 100%             | .           | 48%        | .             | .              | .            | .         | 67%           |     |
|                                     | Wood heating                              | 18386 | 14%            | 0%          | 0%           | 40%              | 0%          | 14%        | .             | .              | .            | .         | 14%           |     |
|                                     | Coal/coke heating                         | 17603 | 4%             | 0%          | 0%           | 1%               | 0%          | 0%         | .             | .              | .            | .         | 4%            |     |
|                                     | Gas heating                               | 16261 | 28%            | .           | .            | 34%              | .           | 34%        | .             | .              | .            | .         | 28%           |     |
|                                     | Heating in 1 <sup>st</sup> year           | 15523 | 68%            | .           | .            | .                | .           | .          | .             | .              | .            | .         | 68%           |     |
|                                     | Wood heating in 1 <sup>st</sup> year      | 16894 | 20%            | .           | .            | .                | .           | .          | .             | .              | .            | .         | 20%           |     |
|                                     | Coal/coke heating in 1 <sup>st</sup> year | 16330 | 6%             | .           | .            | .                | .           | .          | .             | .              | .            | .         | 6%            |     |
|                                     | Cooking electric                          | 20728 | 45%            | 1%          | 15%          | .                | .           | 11%        | 0%            | .              | 0%           | .         | 43%           |     |
|                                     | Cooking gas                               | 29549 | 54%            | 100%        | 95%          | 56%              | .           | 77%        | 99%           | 96%            | 97%          | 61%       | 63%           |     |
| Cooking gas in 1 <sup>st</sup> year | 18776                                     | 19%   | .              | .           | .            | .                | .           | 99%        | .             | 99%            | 56%          | 27%       |               |     |
| Animals                             | Pets                                      | 20342 | 43%            | 51%         | 63%          | 77%              | 30%         | 58%        | 37%           | 60%            | 57%          | 70%       | 51%           |     |
|                                     | Cats                                      | 30397 | 15%            | 19%         | 36%          | 48%              | 10%         | 31%        | 10%           | 37%            | 33%          | 30%       | 20%           |     |
|                                     | Dogs                                      | 30379 | 14%            | 32%         | 43%          | 41%              | 22%         | 36%        | 25%           | 44%            | 42%          | 20%       | 20%           |     |
|                                     | Birds                                     | 24130 | 14%            | .           | .            | .                | .           | .          | .             | .              | .            | 6%        | 13%           |     |
|                                     | Cat in 1 <sup>st</sup> year               | 21091 | 9%             | .           | .            | .                | .           | .          | 7%            | .              | 7%           | 29%       | 12%           |     |
|                                     | Dog in 1 <sup>st</sup> year               | 21091 | 8%             | .           | .            | .                | .           | .          | 18%           | .              | 18%          | 19%       | 10%           |     |
|                                     | Bird in 1 <sup>st</sup> year              | 20399 | 7%             | .           | .            | .                | .           | .          | .             | .              | .            | 5%        | 7%            |     |
|                                     | Farm animals                              | 22052 | 7%             | .           | 77%          | .                | 42%         | 60%        | .             | 22%            | 22%          | .         | 11%           |     |

|                  |                                          |       |     |     |      |     |     |     |      |     |     |      |     |
|------------------|------------------------------------------|-------|-----|-----|------|-----|-----|-----|------|-----|-----|------|-----|
| Diet/<br>weight  | Meat weekly                              | 26025 | 88% | .   | 100% | 92% | .   | 95% | 61%  | 88% | 85% | .    | 87% |
|                  | Seafood weekly                           | 26507 | 57% | .   | 90%  | 54% | .   | 69% | 10%  | 92% | 81% | .    | 62% |
|                  | Green vegetables weekly                  | 24540 | 83% | .   | .    | .   | .   | .   | 31%  | 73% | 68% | 78%  | 79% |
|                  | Fruit weekly                             | 25019 | 90% | 69% | 96%  | 98% | .   | 93% | 50%  | 93% | 87% | 96%  | 90% |
|                  | Fast food weekly                         | 17878 | 25% | 94% | 11%  | 47% | .   | 42% | 10%  | 6%  | 7%  | .    | 20% |
|                  | Fruit juice weekly                       | 18553 | 69% | .   | .    | .   | .   | .   | 55%  | .   | 55% | 69%  | 69% |
|                  | Overweight                               | 14615 | 25% | 21% | 26%  | 23% | 18% | 22% | 27%  | 8%  | 10% | 14%  | 18% |
|                  | Obese                                    | 14615 | 7%  | 7%  | 6%   | 5%  | 3%  | 5%  | 13%  | 1%  | 3%  | 3%   | 4%  |
| Family/<br>birth | Older siblings                           | 29536 | 52% | .   | .    | .   | .   | .   | 62%  | 76% | 75% | 52%  | 56% |
|                  | Younger siblings                         | 29470 | 49% | .   | .    | .   | .   | .   | 42%  | 77% | 72% | 52%  | 53% |
|                  | More than 1 sibling                      | 29528 | 40% | .   | .    | .   | .   | .   | 47%  | 87% | 82% | 34%  | 47% |
|                  | Ever breastfed                           | 29588 | 78% | .   | .    | .   | .   | .   | 96%  | 98% | 97% | 80%  | 82% |
|                  | Low birthweight                          | 20176 | 18% | .   | .    | .   | .   | .   | .    | .   | .   | 4%   | 16% |
|                  | Premature                                | 16875 | 16% | .   | .    | .   | .   | .   | 8%   | .   | 8%  | 9%   | 14% |
|                  | Parental allergic diseases               | 31175 | 36% | .   | .    | .   | .   | .   | 31%  | 41% | 40% | 74%  | 39% |
|                  | Maternal education                       | 18189 | 79% | .   | .    | .   | .   | .   | 44%  | 32% | 34% | 100% | 70% |
|                  | Paternal education                       | 18389 | 80% | .   | .    | .   | .   | .   | 100% | 38% | 46% | 100% | 74% |
| Air-quality      | Any smokers                              | 29371 | 45% | .   | .    | .   | .   | .   | 21%  | 44% | 41% | 29%  | 43% |
|                  | Maternal smoking                         | 30869 | 25% | .   | .    | .   | .   | .   | 11%  | 13% | 13% | 16%  | 22% |
|                  | Maternal smoking in 1 <sup>st</sup> year | 27364 | 19% | .   | .    | .   | .   | .   | 10%  | 11% | 11% | 17%  | 17% |
|                  | Maternal smoking during pregnancy        | 28545 | 12% | .   | .    | .   | .   | .   | 10%  | 10% | 10% | 16%  | 12% |
|                  | Damp                                     | 17670 | 14% | 38% | 38%  | 15% | 30% | 28% | .    | .   | .   | 90%  | 20% |
|                  | Mould                                    | 15021 | 9%  | 40% | 22%  | 54% | 35% | 39% | .    | .   | .   | 52%  | 15% |
|                  | Damp or mould                            | 15512 | 18% | 50% | 42%  | 55% | 48% | 49% | 60%  | .   | 60% | 92%  | 28% |
|                  | Damp in 1 <sup>st</sup> year             | 17763 | 15% | .   | .    | .   | .   | .   | .    | .   | .   | 49%  | 20% |
|                  | Mould in 1 <sup>st</sup> year            | 14599 | 10% | .   | .    | .   | .   | .   | .    | .   | .   | 25%  | 13% |
| Air conditioning | 14910                                    | 29%   | 2%  | .   | 3%   | .   | 3%  | 1%  | .    | 1%  | .   | 27%  |     |

ISAAC=International Study of Asthma and Allergies in Childhood; WASP=World Asthma Phenotypes; SCAALA=Social Changes, Asthma and Allergy in Latin America; ALSPAC= Avon Longitudinal Study of Parents and Children
